# Supplementary material for: The Impact of the Mediterranean Diet and Lifestyle Intervention on Lipoprotein Subclass Profiles among Metabolic Syndrome Patients: Findings of a Randomized Controlled Trial
Source: MDPI journal article supplement (doi:10.3390/ijms25021338), 2024-01-22
Supplement: s1 [file s1]

## SUPPLEMENTARY MATERIAL

**Table S1:** Advanced lipoprotein profile characteristics at baseline by treatment allocation.

|                 |            | <i>Units</i> | <i>Control group</i><br><i>N=94</i> | <i>Intervention group</i><br><i>N=103</i> | <i>P value</i> |
|-----------------|------------|--------------|-------------------------------------|-------------------------------------------|----------------|
| Cholesterol     |            |              |                                     |                                           |                |
|                 | sdLDL      | mmol/L       | 0.60 (0.53, 0.67)                   | 0.60 (0.52, 0.68)                         | 0.963          |
|                 | sdLDL /LDL | %            | 16.5 (14.7,18.3)                    | 18.3 (15.9,20.8)                          | 0.229          |
|                 | VLDL       | mg/dL        | 31.9 (25.6, 38.2)                   | 31.5 (25.3, 37.8)                         | 0.932          |
|                 | IDL        | mg/dL        | 17.4 (15.1, 19.8)                   | 15.4 (13.0, 17.8)                         | 0.210          |
| Triglycerides   |            |              |                                     |                                           |                |
|                 | VLDL       | mg/dL        | 113 (91, 134)                       | 112 (86, 138)                             | 0.967          |
|                 | IDL        | mg/dL        | 16.8 (14.9, 18.8)                   | 15.6 (13.7, 17.6)                         | 0.380          |
|                 | LDL        | mg/dL        | 21.9 (19.4, 24.5)                   | 20.0 (17.1, 22.9)                         | 0.295          |
|                 | HDL        | mg/dL        | 25.9 (20.8, 31.1)                   | 25.7 (21.9, 29.6)                         | 0.950          |
| Particle number |            |              |                                     |                                           |                |
|                 | VLDL       | nmol/L       | 89.4 (72.1, 106.8)                  | 87.8 (68.3, 107.3)                        | 0.894          |
|                 | IVLDL      | nmol/L       | 2.10 (1.75, 2.44)                   | 2.16 (1.80, 2.52)                         | 0.806          |
|                 | mVLDL      | nmolL        | 7.23 (5.65, 8.80)                   | 7.64 (5.62, 9.66)                         | 0.737          |
|                 | sVLDL      | nmolL        | 80.1 (64.2, 96.0)                   | 78.0 (60.6, 95.3)                         | 0.850          |
|                 | IVLDL/VLDL | %            | 2.46 (2.28, 2.64)                   | 2.60 (2.39, 2.80)                         | 0.291          |
|                 | mVLDL/VLDL | %            | 8.29 (7.28, 9.29)                   | 8.64 (7.68, 9.60)                         | 0.597          |
|                 | sVLDL/VLDL | %            | 89.3 (88.3, 90.2)                   | 88.8 (87.8, 89.7)                         | 0.456          |
|                 | LDL        | nmolL        | 1490 (1350, 1630)                   | 1356 (1244, 1468)                         | 0.130          |
|                 | ILDL       | nmolL        | 178 (162, 194)                      | 166 (149, 183)                            | 0.303          |
|                 | mLDL       | nmolL        | 411 (348, 474)                      | 359 (305, 412)                            | 0.199          |
|                 | sLDL       | nmolL        | 901 (815, 987)                      | 831 (770, 891)                            | 0.178          |
|                 | ILDL/LDL   | %            | 12.1 (11.3, 12.9)                   | 12.3 (11.4, 13.1)                         | 0.763          |
|                 | mLDL/LDL   | %            | 27.2 (24.8, 29.5)                   | 26.0 (23.7, 28.3)                         | 0.449          |
|                 | sLDL/LDL   | %            | 60.7 (58.0, 63.5)                   | 61.7 (58.9, 64.6)                         | 0.588          |
|                 | HDL        | μmol/L       | 29.9 (26.9, 32.9)                   | 29.6 (27.9, 31.2)                         | 0.819          |
|                 | IHDL       | μmol/L       | 0.31 (0.28, 0.33)                   | 0.28 (0.26, 0.30)                         | 0.099          |
|                 | mHDL       | μmol/L       | 9.55 (8.63, 10.47)                  | 8.89 (8.39, 9.40)                         | 0.214          |
|                 | sHDL       | μmol/L       | 20.1 (17.9, 22.2)                   | 20.4 (18.8, 21.9)                         | 0.820          |
|                 | IHDL/HDL   | %            | 1.04 (0.97, 1.11)                   | 0.96 (0.88, 1.05)                         | 0.159          |
|                 | mHDL/HDL   | %            | 32.1 (30.5, 33.6)                   | 30.4 (28.3, 32.4)                         | 0.167          |
|                 | sHDL/HDL   | %            | 66.9 (65.3,68.5)                    | 68.7 (66.5, 70.8)                         | 0.162          |
|                 | Non-HDL    | nmolL        | 1550 (1411, 1688)                   | 1414 (1300, 1527)                         | 0.126          |
| Particle size   |            |              |                                     |                                           |                |
|                 | VLDL       | nm           | 41.8 (41.6, 41.9)                   | 41.8 (41.7, 42.0)                         | 0.310          |
|                 | LDL        | nm           | 20.8 (20.6, 20.9)                   | 20.7 (20.6, 20.9)                         | 0.747          |
|                 | HDL        | nm           | 8.25 (8.22, 8.28)                   | 8.22 (8.18, 8.25)                         | 0.153          |

Data are means (95% confidence interval). sdLDL (small dense LDL); LDL (Low Density Lipoprotein); VLDL (Very Low Density Lipoprotein); IDL (Intermediate Density Lipoprotein); HDL (High Density Lipoprotein); mVLDL (medium VLDL); sVLDL (small VLDL); ILDL (large LDL); mLDL (medium LDL); sLDL (small LDL); IHDL (large HDL); mHDL (medium HDL); sHDL (small HDL); Non-HDL (Non-HDL).

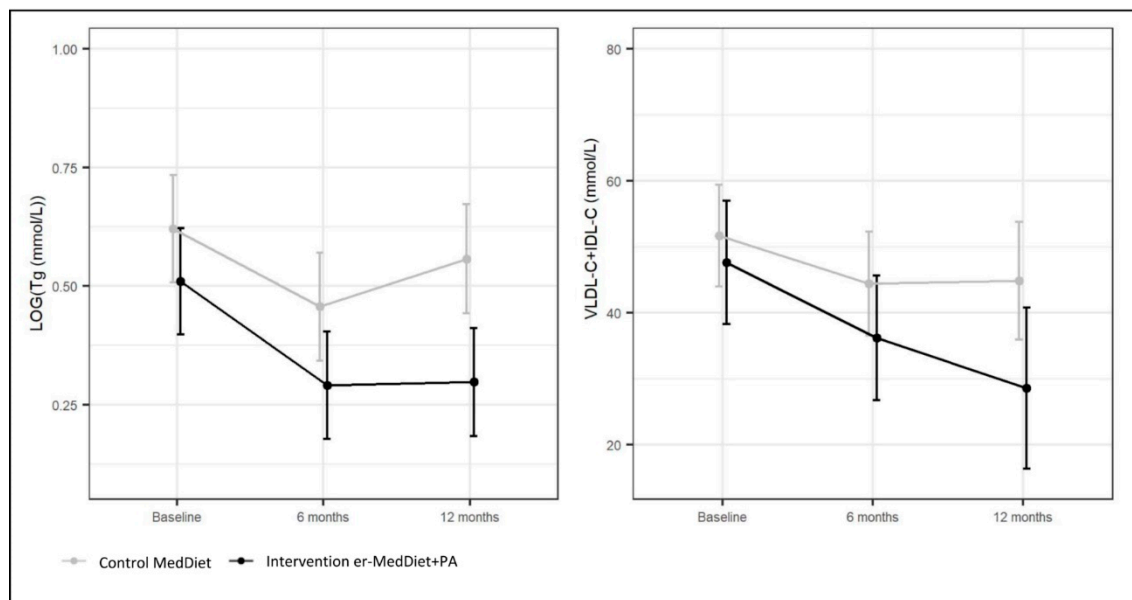

**Figure S1:** Effect of MetDiet and er-MetDiet+PA on Triglycerides and Remnant Lipoproteins at 6 and 12 months. LOG(Tg) (Log-transformed Triglycerides); VLDL-C (Very Low Density Lipoproteins Cholesterol); IDL-C (Intermediate Density Lipoproteins Cholesterol); MedDiet (Mediterranean Diet; er-MedDiet +PA (energy-reduced MedDiet and physical activity).

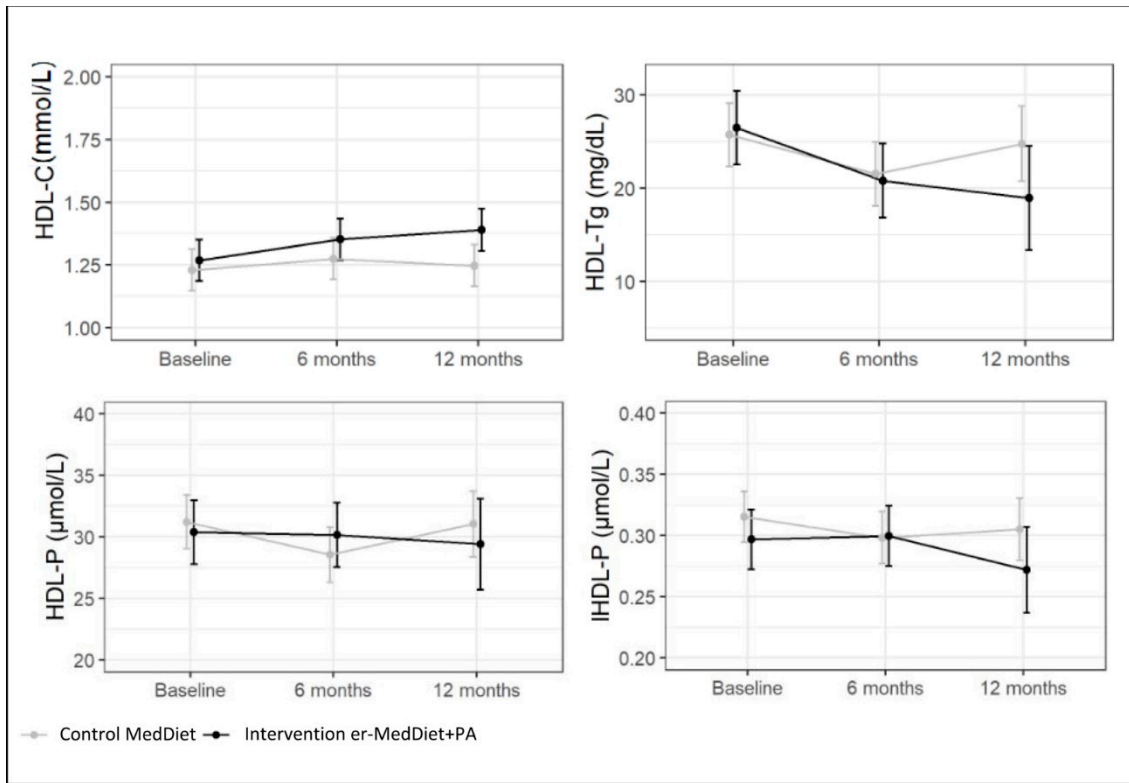

**Figure S2:** Effect of MetDiet and er-MetDiet+PA on HDL lipid composition and particle concentration at 6 and 12 months. HDL-C (High Density Lipoproteins Cholesterol); HDL-P (HDL Particle Number); HDL-Tg (HDL Triglycerides); IHDL-P (large HDL Particle Number); MedDiet (Mediterranean diet); er-MedDiet +PA (energy-reduced MedDiet and physical activity).

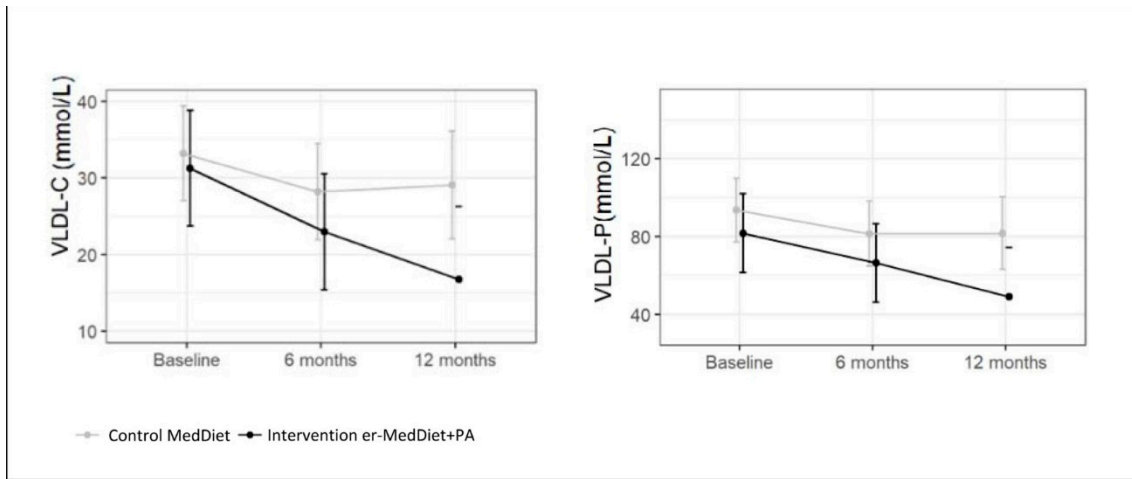

**Figure S3:** Effect of MetDiet and er-MetDiet+PA on VLDL advanced lipid profile results at 6 and 12 months. VLDL-C (Very Low Density Lipoproteins Cholesterol); VLDL-P (VLDL Particle Number); MedDiet (Mediterranean diet); er-MedDiet +PA (energy-reduced MedDiet and physical activity).

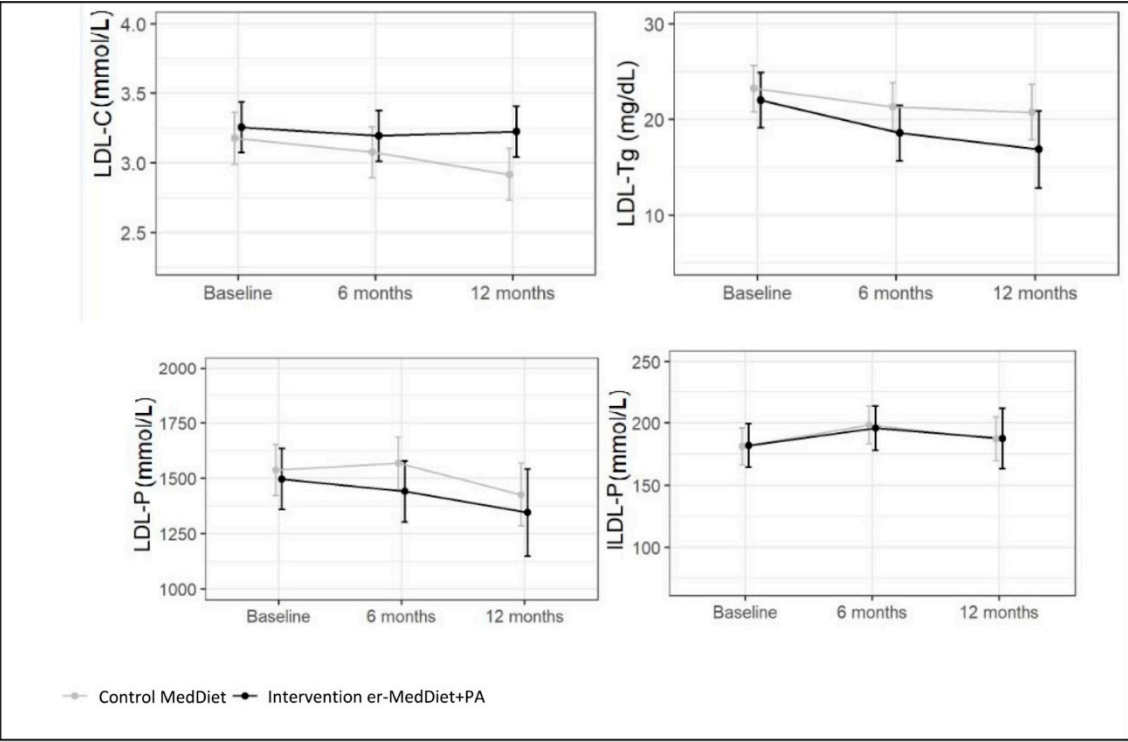

**Figure S4:** Effect of MetDiet and er-MetDiet+PA on LDL lipid composition and particle concentration at 6 and 12 months. LDL-C (Low Density Lipoproteins Cholesterol); LDL-P (LDL Particle Number); LDL-Tg (LDL Triglycerides); ILDL-P (large LDL Particle Number); MedDiet (Mediterranean diet); er-MetDiet +PA (energy-reduced MedDiet and physical activity).

**Table S2:** Effects of MedDiet and er-MedDiet+PA based intervention on lipid and anthropometric variables observed at 6 and 12 months in women.

|                                      | Time effect (Control effect*) |                 |                         |                 | Interaction group and time (Intervention vs. Control effect**) |                 |                       |                 |
|--------------------------------------|-------------------------------|-----------------|-------------------------|-----------------|----------------------------------------------------------------|-----------------|-----------------------|-----------------|
|                                      | 6 months                      |                 | 12 months               |                 | 6 months                                                       |                 | 12 months             |                 |
|                                      | Coefficient [95%CI]           | P value         | Coefficient [95%CI]     | P value         | Coefficient [95%CI]                                            | P value         | Coefficient [95%CI]   | P value         |
| Body Mass Index (kg/m <sup>2</sup> ) | -0.53[-0.92;-0.15]            | <b>&lt;0.01</b> | -0.71[-1.1;-0.33]       | <b>&lt;0.01</b> | -1.62[-2.15;-1.08]                                             | <b>&lt;0.01</b> | -1.41[-1.95;-0.87]    | <b>&lt;0.01</b> |
| Waist circumference (cm)             | -2.77[-4.42;-1.12]            | <b>&lt;0.01</b> | -2.01[-3.67;-0.36]      | <b>0.017</b>    | -1.81[-4.11;0.5]                                               | 0.125           | -2.11[-4.43;0.21]     | 0.074           |
| Cholesterol                          |                               |                 |                         |                 |                                                                |                 |                       |                 |
| LDL (mmol/L)                         | -0.06[-0.29;0.18]             | 0.639           | -0.28[-0.52;-0.05]      | <b>0.019</b>    | 0.1[-0.22;0.43]                                                | 0.537           | 0.34[0.01;0.66]       | <b>0.045</b>    |
| sdLDL (mmol/L)                       | -0.11[-0.29;0.07]             | 0.242           | -0.17[-0.36;0.03]       | 0.089           | -0.17[-0.42;0.08]                                              | 0.192           | -0.03[-0.3;0.24]      | 0.839           |
| HDL (mmol/L)                         | 0.05[-0.01;0.11]              | 0.078           | 0.01[-0.04;0.07]        | 0.65            | -0.04[-0.12;0.04]                                              | 0.346           | 0.07[-0.01;0.15]      | 0.108           |
| Non-HDL (mmol/L)                     | -0.12[-0.46;0.22]             | 0.494           | -0.54[-0.9;-0.18]       | <b>&lt;0.01</b> | 0.29[-0.18;0.77]                                               | 0.228           | 0.8[0.27;1.32]        | <b>&lt;0.01</b> |
| IDL (mg/dL)                          | -2.59[-7.82;2.65]             | 0.333           | -3.74[-9.34;1.85]       | 0.189           | 0.47[-6.93;7.87]                                               | 0.901           | -3.22[-11.79;5.35]    | 0.462           |
| VLDL (mg/dL)                         | -6.86[-16.86;3.15]            | 0.179           | -8.59[-19.27;2.08]      | 0.115           | 3.05[-11.07;17.18]                                             | 0.672           | -8.86[-25.22;7.51]    | 0.289           |
| VLDL+IDL (mg/dL)                     | -9.44[-23.16;4.28]            | 0.177           | -12.34[-26.98;2.31]     | 0.099           | 3.52[-15.85;22.9]                                              | 0.722           | -12.07[-34.52;10.37]  | 0.292           |
| Triglycerides                        |                               |                 |                         |                 |                                                                |                 |                       |                 |
| LOG(Tg (mmol/L))                     | -0.12[-0.24;0]                | <b>0.049</b>    | -0.06[-0.17;0.06]       | 0.357           | 0.01[-0.15;0.18]                                               | 0.875           | -0.06[-0.22;0.11]     | 0.49            |
| LDL (mg/dL)                          | -1.4[-7.03;4.23]              | 0.626           | -3.25[-9.25;2.76]       | 0.289           | -1.2[-9.15;6.74]                                               | 0.767           | -4.25[-13.45;4.96]    | 0.366           |
| HDL (mg/dL)                          | -7.36[-15.74;1.02]            | 0.085           | -1.2[-10.17;7.76]       | 0.793           | 2.41[-9.43;14.25]                                              | 0.69            | -7.27[-21.05;6.52]    | 0.301           |
| IDL (mg/dL)                          | -2.03[-6.11;2.04]             | 0.329           | -2.2[-6.56;2.15]        | 0.321           | 0.44[-5.32;6.19]                                               | 0.882           | -4[-10.66;2.67]       | 0.24            |
| VLDL (mg/dL)                         | -24.59[-56.15;6.96]           | 0.127           | -27.26[-61.27;6.75]     | 0.116           | 25.38[-19.22;69.97]                                            | 0.265           | -14.64[-67.44;38.16]  | 0.587           |
| Particle number                      |                               |                 |                         |                 |                                                                |                 |                       |                 |
| LDL (nmol/L)                         | -36.98[-327.12;253.16]        | 0.803           | -247.26[-556.99;62.47]  | 0.118           | 45.04[-364.73;454.8]                                           | 0.829           | 37.41[-437.26;512.08] | 0.877           |
| LDL (μmol/L)                         | 19.5[-13.81;52.8]             | 0.251           | -5.54[-41.1;30.01]      | 0.76            | -4.7[-51.73;42.34]                                             | 0.845           | 2.51[-51.98;57]       | 0.928           |
| sLDL (nmol/L)                        | -65.28[-211.74;81.17]         | 0.382           | -175.43[-334.41;-16.44] | <b>0.031</b>    | 74.91[-132.19;282.02]                                          | 0.478           | 78.19[-171.01;327.4]  | 0.539           |
| HDL (μmol/L)                         | -5.65[-11.72;0.42]            | 0.068           | 0.02[-6.46;6.5]         | 0.995           | 4.17[-4.4;12.74]                                               | 0.34            | -1.59[-11.52;8.34]    | 0.754           |
| LDL (μmol/L)                         | -0.03[-0.08;0.02]             | 0.252           | -0.01[-0.07;0.04]       | 0.616           | 0.02[-0.05;0.09]                                               | 0.535           | -0.02[-0.1;0.06]      | 0.658           |
| sHDL (μmol/L)                        | -3.98[-8.26;0.3]              | 0.068           | 0.25[-4.32;4.82]        | 0.915           | 2.46[-3.58;8.5]                                                | 0.425           | -2.43[-9.43;4.57]     | 0.496           |
| VLDL (nmol/L)                        | -21.53[-48.06;5]              | 0.112           | -24.24[-52.8;4.32]      | 0.096           | 19.76[-17.73;57.25]                                            | 0.302           | -13.84[-58.1;30.41]   | 0.54            |
| LDL (nmol/L)                         | -0.31[-0.87;0.25]             | 0.272           | -0.28[-0.88;0.32]       | 0.365           | 0.28[-0.5;1.07]                                                | 0.48            | -0.49[-1.42;0.44]     | 0.302           |
| sVLDL (nmol/L)                       | -20.74[-45.3;3.82]            | 0.098           | -22.83[-49.31;3.65]     | 0.091           | 19.36[-15.35;54.08]                                            | 0.274           | -11.89[-53;29.22]     | 0.571           |
| Particle size                        |                               |                 |                         |                 |                                                                |                 |                       |                 |
| VLDL (nm)                            | 0.22[-0.06;0.5]               | 0.13            | 0.27[-0.04;0.58]        | 0.083           | -0.18[-0.58;0.22]                                              | 0.376           | 0.16[-0.32;0.63]      | 0.518           |
| LDL (nm)                             | 0.18[-0.08;0.44]              | 0.164           | 0.3[0.02;0.58]          | <b>0.036</b>    | -0.11[-0.47;0.26]                                              | 0.565           | -0.11[-0.55;0.32]     | 0.609           |
| HDL (nm)                             | 0.01[-0.03;0.04]              | 0.791           | 0[-0.05;0.04]           | 0.876           | 0.02[-0.03;0.08]                                               | 0.386           | 0.05[-0.01;0.12]      | 0.109           |

LDL (Low Density Lipoprotein); sdLDL (small dense LDL); HDL (High Density Lipoprotein); Non-HDL (Non-High-Density Lipoprotein); IDL (Intermediate Density Lipoprotein); VLDL (Very Low-Density Lipoprotein); VLDL+IDL (Remnant Lipoproteins); Tg (Triglycerides); LDL (large LDL); sLDL (small LDL); LDL (large HDL); sHDL (small HDL); VLDL (large VLDL); sVLDL (small VLDL); [IC95%] (95% confidence interval). Significant values are indicated with bold lettering. Data were analyzed by linear mixed models with intervention group, time (baseline, 6 and 12 months), interaction of group and time, and adjusted by age, the administration of lipid-lowering treatments, and smoking status. \* Time effect: can be interpreted as the effect observed in the Control group. \*\* Interaction group and time: can be interpreted as the additional effect of the intervention group compared to the control group.

**Table S3:** Effects of MedDiet and er-MedDiet+PA based intervention on lipid and anthropometric variables observed at 6 and 12 months in men.

|                                      | Time effect (Control effect*) |                 |                       |                 | Interaction group and time (Intervention vs. Control effect**) |                 |                         |                 |
|--------------------------------------|-------------------------------|-----------------|-----------------------|-----------------|----------------------------------------------------------------|-----------------|-------------------------|-----------------|
|                                      | 6 months                      |                 | 12 months             |                 | 6 months                                                       |                 | 12 months               |                 |
|                                      | Coefficient [95%CI]           | P value         | Coefficient [95%CI]   | P value         | Coefficient [95%CI]                                            | P value         | Coefficient [95%CI]     | P value         |
| Body Mass Index (kg/m <sup>2</sup> ) | -0.63[-0.98;-0.27]            | <b>&lt;0.01</b> | -0.52[-0.88;-0.16]    | <b>&lt;0.01</b> | -1.3[-1.8;-0.8]                                                | <b>&lt;0.01</b> | -1.43[-1.94;-0.92]      | <b>&lt;0.01</b> |
| Waist circumference (cm)             | -1.2[-2.48;0.08]              | 0.067           | -2.43[-3.75;-1.11]    | <b>&lt;0.01</b> | -4.02[-5.83;-2.21]                                             | <b>&lt;0.01</b> | -2.18[-4.02;-0.33]      | <b>0.021</b>    |
| Cholesterol                          |                               |                 |                       |                 |                                                                |                 |                         |                 |
| LDL (mmol/L)                         | -0.14[-0.36;0.07]             | 0.186           | -0.24[-0.46;-0.01]    | <b>0.037</b>    | -0.03[-0.33;0.27]                                              | 0.838           | 0.12[-0.18;0.42]        | 0.447           |
| sdLDL (mmol/L)                       | -0.1[-0.26;0.06]              | 0.23            | -0.09[-0.27;0.08]     | 0.305           | -0.25[-0.47;-0.02]                                             | <b>0.03</b>     | -0.27[-0.52;-0.02]      | <b>0.031</b>    |
| HDL (mmol/L)                         | 0.04[-0.03;0.1]               | 0.246           | 0.02[-0.05;0.09]      | 0.537           | 0.11[0.02;0.2]                                                 | <b>0.019</b>    | 0.14[0.04;0.23]         | <b>&lt;0.01</b> |
| Non-HDL (mmol/L)                     | -0.08[-0.39;0.23]             | 0.597           | -0.21[-0.56;0.13]     | 0.229           | -0.14[-0.58;0.3]                                               | 0.531           | 0.32[-0.19;0.83]        | 0.22            |
| IDL (mg/dL)                          | -2.04[-4.27;0.2]              | 0.074           | -1.97[-4.61;0.67]     | 0.145           | -1.79[-5.2;1.61]                                               | 0.302           | -0.85[-5.49;3.8]        | 0.721           |
| VLDL (mg/dL)                         | -4.03[-10.65;2.6]             | 0.234           | -1.65[-9.5;6.19]      | 0.679           | -7.3[-17.42;2.82]                                              | 0.158           | -13.18[-27.02;0.66]     | 0.062           |
| VLDL+IDL (mg/dL)                     | -6.06[-14.47;2.34]            | 0.157           | -3.64[-13.59;6.31]    | 0.474           | -9.16[-22;3.67]                                                | 0.162           | -14.02[-31.55;3.51]     | 0.117           |
| Triglycerides                        |                               |                 |                       |                 |                                                                |                 |                         |                 |
| LOG(Tg (mmol/L))                     | -0.21[-0.34;-0.08]            | <b>&lt;0.01</b> | -0.07[-0.21;0.07]     | 0.321           | -0.12[-0.31;0.06]                                              | 0.198           | -0.24[-0.43;-0.05]      | <b>0.014</b>    |
| LDL (mg/dL)                          | -1.99[-4.95;0.97]             | 0.187           | -1.87[-5.35;1.6]      | 0.291           | -2.18[-6.68;2.31]                                              | 0.34            | -1.92[-8;4.17]          | 0.537           |
| HDL (mg/dL)                          | -2.26[-6.57;2.04]             | 0.302           | -0.66[-5.58;4.26]     | 0.792           | -3.77[-10.15;2.62]                                             | 0.247           | -6.02[-14.46;2.43]      | 0.163           |
| IDL (mg/dL)                          | -1.61[-3.48;0.25]             | 0.09            | -1.39[-3.6;0.81]      | 0.216           | -1.55[-4.4;1.29]                                               | 0.284           | -0.98[-4.87;2.9]        | 0.62            |
| VLDL (mg/dL)                         | -9.05[-36.42;18.33]           | 0.517           | -6.95[-39.29;25.38]   | 0.673           | -35.85[-77.58;5.87]                                            | 0.092           | -66.91[-123.79;-10.02]  | <b>0.021</b>    |
| Particle number                      |                               |                 |                       |                 |                                                                |                 |                         |                 |
| LDL (nmol/L)                         | 70.12[-89.84;230.08]          | 0.39            | -39.2[-226.51;148.11] | 0.682           | -171.03[-413.41;71.34]                                         | 0.167           | -86.08[-413.05;240.9]   | 0.606           |
| lLDL (μmol/L)                        | 17.25[-0.35;34.85]            | 0.055           | 11.03[-9.76;31.83]    | 0.298           | -2.65[-29.48;24.18]                                            | 0.847           | 2.05[-34.53;38.63]      | 0.913           |
| sLDL (nmol/L)                        | 50.44[-67.52;168.4]           | 0.402           | -24.94[-160.4;110.52] | 0.718           | -160.8[-337.92;16.32]                                          | 0.075           | -104.49[-337.11;128.13] | 0.379           |
| HDL (μmol/L)                         | -1.43[-3.8;0.94]              | 0.236           | -0.32[-3.1;2.45]      | 0.819           | 1.64[-1.95;5.23]                                               | 0.372           | 0.18[-4.68;5.05]        | 0.941           |
| lHDL (μmol/L)                        | -0.01[-0.04;0.02]             | 0.47            | -0.01[-0.05;0.03]     | 0.597           | 0.02[-0.03;0.07]                                               | 0.428           | -0.02[-0.08;0.05]       | 0.608           |
| sHDL (μmol/L)                        | -0.8[-2.98;1.38]              | 0.471           | 0.14[-2.43;2.71]      | 0.914           | 0.36[-2.96;3.68]                                               | 0.83            | 0.25[-4.27;4.76]        | 0.914           |
| VLDL (nmol/L)                        | -7.28[-25.01;10.46]           | 0.421           | -4.76[-25.77;16.25]   | 0.657           | -17.39[-45.21;10.44]                                           | 0.221           | -28.53[-67.24;10.18]    | 0.149           |
| lVLDL (nmol/L)                       | -0.07[-0.43;0.29]             | 0.706           | 0[-0.43;0.43]         | 0.99            | -0.57[-1.12;-0.01]                                             | <b>0.046</b>    | -0.97[-1.73;-0.21]      | <b>0.013</b>    |
| sVLDL (nmol/L)                       | -5.76[-25.03;13.51]           | 0.558           | -4.1[-26.87;18.67]    | 0.724           | -7.66[-37.03;21.71]                                            | 0.609           | -7.67[-47.73;32.38]     | 0.707           |
| Particle size                        |                               |                 |                       |                 |                                                                |                 |                         |                 |
| VLDL (nm)                            | -0.04[-0.22;0.14]             | 0.652           | -0.01[-0.22;0.2]      | 0.926           | 0.18[-0.1;0.46]                                                | 0.212           | 0.27[-0.09;0.63]        | 0.143           |
| LDL (nm)                             | 0.01[-0.21;0.24]              | 0.901           | 0.05[-0.21;0.31]      | 0.72            | 0.24[-0.1;0.58]                                                | 0.171           | 0.15[-0.3;0.6]          | 0.517           |
| HDL (nm)                             | 0[-0.04;0.03]                 | 0.822           | -0.02[-0.06;0.02]     | 0.37            | -0.01[-0.07;0.05]                                              | 0.641           | 0.02[-0.06;0.1]         | 0.586           |

LDL (Low Density Lipoprotein); sdLDL (small dense LDL); HDL (High Density Lipoprotein); Non-HDL (Non-High-Density Lipoprotein); IDL (Intermediate Density Lipoprotein); VLDL (Very Low-Density Lipoprotein); VLDL+IDL (Remnant Lipoproteins); Tg (Triglycerides); lLDL (large LDL); sLDL (small LDL); lHDL (large HDL); sHDL (small HDL); lVLDL (large VLDL); sVLDL (small VLDL); [IC95%] (95% confidence interval). Significant values are indicated with bold lettering. Data were analyzed by linear mixed models with intervention group, time (baseline, 6 and 12 months), interaction of group and time, and adjusted by age, the administration of lipid-lowering treatments, and smoking status. \* Time effect: can be interpreted as the effect observed in the Control group. \*\* Interaction group and time: can be interpreted as the additional effect of the intervention group compared to the control group.

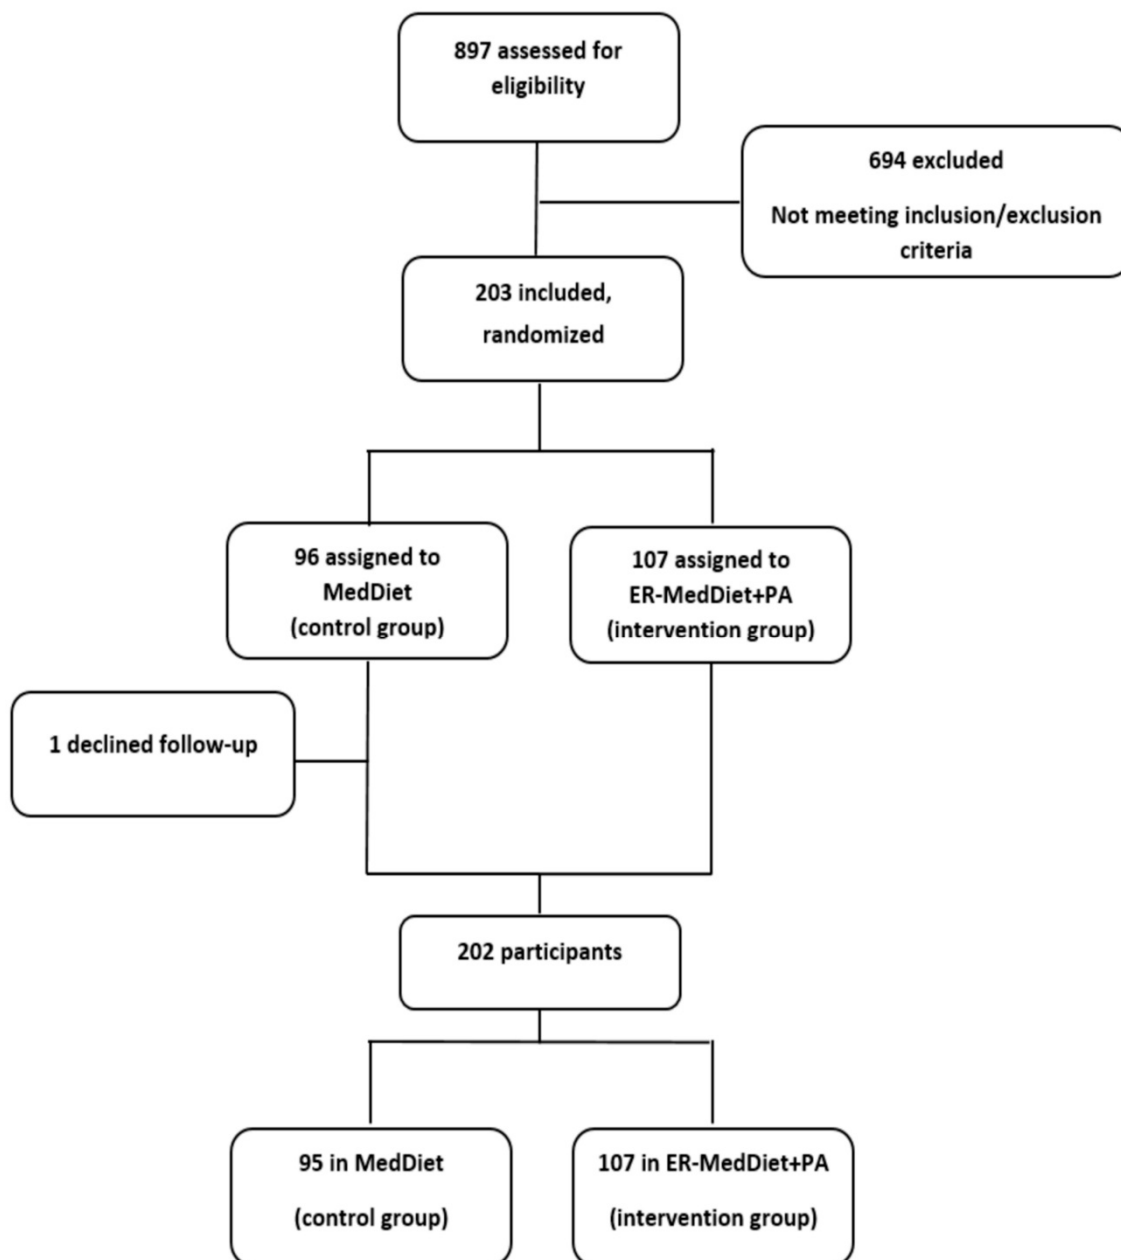

**Figure S5:** Trial flow chart.  
MedDiet (Mediterranean diet); er-MedDiet +PA (energy-reduced MedDiet and physical activity).
